# Supplementary material for: Preparation of boron nitride-based coatings on metallic substrates via infrared irradiation of dip-coated polyborazylene
Source: Royal Society of Chemistry journal article supplement (doi:10.1039/b820327j), 2009-01-01
Supplement: b820327j.pdf [file b820327j.pdf]

### **Supplementary information**

#### ***Experimental part.***

*Synthesis of liquid polyborazylene.* Borazine is prepared by reaction of  $\text{NaBH}_4$  with  $(\text{NH}_4)_2\text{SO}_4$  in tetraglyme as already described in the literature [21]. 20 ml of pure borazine are placed in a pressure vessel under argon at  $0^\circ\text{C}$  to decrease monomer volatility. The autoclave is heated from  $0^\circ\text{C}$  to  $45^\circ\text{C}$  ( $5^\circ\text{C}/\text{h}$ ) and then kept at the final temperature for 96 hours, the pressure reaching 5.5 Bar. After this period, the autoclave is cooled down to room temperature and degassed (carefully). At the end of the experiment, about 15 mL of a colorless liquid polyborazylene is obtained.

*Sample preparation.* Titanium (aluminium and copper) pieces ( $1 \times 5$  cm) of 99,9% purity (Neyco) are polished and treated at  $300^\circ\text{C}$  under vacuum for 2h prior using.

*Dip-coating process.* Due to the air sensitivity of the polymer, all the dip-coatings are carried out in a gloves box filled with argon. A series of three dips is performed for all the samples, each dip being followed by a classical heating at  $100^\circ\text{C}$  to occur the solidification of the dip-coated polymer.

*Infrared annealing.* Still in the gloves box, the preceramic coating deposited onto the metallic substrate is placed under an infrared lamp with a reflector MR16 (OSRAM, XENOPHOT 64635 HLX 15V, 150W) to achieve the polymer-to-ceramic conversion. A typical annealing occurs 1 hour, since a rapid lamp intensity increasing is performed. The final temperature (typically  $1200^\circ\text{C}$ ) is measured by a specific thermocouple localized at the focus point of the IR lamp.
